# Supplementary material for: Survival Benefit after Shifting from Upfront Surgery to Neoadjuvant Treatment in Borderline Resectable Pancreatic Cancer
Source: MDPI journal article supplement (doi:10.3390/biomedicines11082302), 2023-08-18
Supplement: s1 [file s1]

**Table S1** Detailed information on neoadjuvant treatment.

| Variables                    | N (%)     |
|------------------------------|-----------|
| Types of regimens            |           |
| FOLFIRINOX                   | 91 (89.2) |
| Gemcitabin-nab-paclitaxel    | 9 (8.8)   |
| CCRT                         | 2 (2.0)   |
| Cycle, median (IQR)          | 6 (4-10)  |
| RECIST response              |           |
| Complete Response            | 1 (0.9)   |
| Partial Response             | 30 (27.3) |
| Stable Disease               | 72 (65.5) |
| Progressive Disease          | 7 (6.4)   |
| CA19-9 response <sup>†</sup> |           |
| Yes                          | 52 (47.3) |
| No                           | 33 (30.0) |
| Initially not elevated       | 25 (22.7) |
| Conversion Surgery           | 68 (61.8) |
| Curative-intent Surgery      | 62 (56.3) |

<sup>†</sup>Response was defined if the value measured after 4 cycles of chemotherapy was decreased by more than 50% from the initial.
